# Supplementary material for: Impulsive and Omission Errors: Potential Temporal Processing Endophenotypes in ADHD
Source: MDPI journal article supplement (doi:10.3390/brainsci11091218), 2021-09-15
Supplement: s1 [file s1]

Supplementary Material

# Impulsive and Omission Errors: Potential Temporal Processing Endophenotypes in ADHD

Johan E. Acosta-López<sup>1,\*</sup>, Isabel Suárez<sup>2</sup>, David A. Pineda<sup>3</sup>, Martha L. Cervantes-Henríquez<sup>1,2</sup>, Martha L. Martínez-Banfi<sup>1</sup>, Semiramis G. Lozano-Gutiérrez<sup>1</sup>, Mostapha Ahmad<sup>1</sup>, Wilmar Pineda-Alhucema<sup>1</sup>, Luz M. Noguera-Machacón<sup>1</sup>, Moisés De La Hoz<sup>1</sup>, Elsy Mejía-Segura<sup>1</sup>, Giomar Jimenez-Figueroa<sup>1</sup>, Manuel Sánchez-Rojas<sup>1</sup>, Claudio A. Mastronardi<sup>4</sup>, Mauricio Arcos-Burgos<sup>5,\*</sup>, Jorge I. Vélez<sup>2,\*</sup>, Pedro J. Puentes-Rozo<sup>1,6</sup>

**Citation:** Acosta-López, J.E.; Suárez, I.; Pineda, D.A.; Cervantes-Henríquez, M.L.; Martínez-Banfi, M.L.; Lozano-Gutiérrez, S.G.; Ahmad, M.; Pineda-Alhucema, W.; Noguera-Machacón, L.M.; De La Hoz, M.; Mejía-Segura, E.; Jimenez-Figueroa, G.; Sánchez-Rojas, M.; Mastronardi, C.A.; Arcos-Burgos, M.; Vélez, J.I.; Puentes-Rozo, P.J. Impulsive and Omission Errors: Potential Temporal Processing Endophenotypes in ADHD. *Brain Sci.* **2021**, *11*, 1218. <https://doi.org/10.3390/brainsci11091218>

- <sup>1</sup> Universidad Simón Bolívar, Facultad de Ciencias Jurídicas y Sociales, Barranquilla, Colombia; jacosta@unisimonbolivar.edu.co (J.E.A.L.), cervantesmh@unisimonbolivar.edu.co (M.L.C.H.), mmartinez108@unisimonbolivar.edu.co (M.L.M.B.), lozanosemiramis@gmail.com (S.G.L.G.), mostapha.ahmad@unisimonbolivar.edu.co (M.A.), wpineda1@unisimonbolivar.edu.co (W.P.A.), lnoguera1@unisimonbolivar.edu.co (L.M.N.M.), mdelahoz48@unisimonbolivar.edu.co (M.D.L.H.), emejia18@unisimonbolivar.edu.co (E.M.S.), gdjimenez@unisimonbolivar.edu.co (G.J.F.), sanchezr@unisimonbolivar.edu.co (M.S.R.), ppuentes1@unisimonbolivar.edu.co (P.J.P.R.).
  - <sup>2</sup> Universidad del Norte, Barranquilla, Colombia; delchiaroi@uninorte.edu.co (I.S.), jvelezv@uninorte.edu.co (J.I.V.).
  - <sup>3</sup> Neuropsychology and Conduct Research Group, University of San Buenaventura, Medellín, Colombia; david.pineda1@udea.edu.co (D.A.P.).
  - <sup>4</sup> INPAC Research Group, Fundación Universitaria Sanitas, Bogotá, Colombia; mastronardic@hotmail.com (C.A.M.).
  - <sup>5</sup> Grupo de Investigación en Psiquiatría (GIPSI), Departamento de Psiquiatría, Instituto de Investigaciones Médicas, Facultad de Medicina, Universidad de Antioquia, Medellín, Colombia; mailto:mauricio.arcos@udea.edu.co (M.A.B.).
  - <sup>6</sup> Grupo de Neurociencias del Caribe, Universidad del Atlántico, Barranquilla, Colombia.
- \* These authors contributed equally to this work.  
# Correspondence: e-mail@e-mail.com.

Academic Editor: Paul E. Engelhardt

Received: 27 July 2021

Accepted: 2 September 2021

Published: 15 September 2021

**Publisher's Note:** MDPI stays neutral with regard to jurisdictional claims in published maps and institutional affiliations.

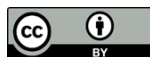

**Copyright:** © 2021 by the authors. Submitted for possible open access publication under the terms and conditions of the Creative Commons Attribution (CC BY) license (<https://creativecommons.org/licenses/by/4.0/>).

**Supplementary Table 1.** Evaluation of a binary system for ADHD prediction. **(a)** Possible results when the real and predicted ADHD status are compared. Here,  $a$  is the number of individuals with ADHD that are correctly classified,  $b$  is the number of ADHD affected individuals classified unaffected (controls),  $c$  corresponds to the number of ADHD unaffected individuals (controls) classified as ADHD affected, and  $d$  to the number of ADHD unaffected individuals correctly classified. **(b)** Expressions for calculating the performance measures used to quantify the performance of the predictive model for ADHD.

**(a)**

| Phenotype     | Prediction    |         |
|---------------|---------------|---------|
|               | ADHD affected | Control |
| ADHD affected | $a$           | $b$     |
| Control       | $c$           | $d$     |

**(b)**

| Measure                  | Expression                       |
|--------------------------|----------------------------------|
| Sensitivity              | $a / (a+c)$                      |
| Specificity              | $d / (b+d)$                      |
| Precision                | $a / (a+b)$                      |
| Classification rate (CR) | $(a+d) / (a+b+c+d)$              |
| Lift                     | $a / (a+b+c+d) / \{(a+b)(a+c)\}$ |

ADHD: Attention Deficit Hyperactivity Disorder.

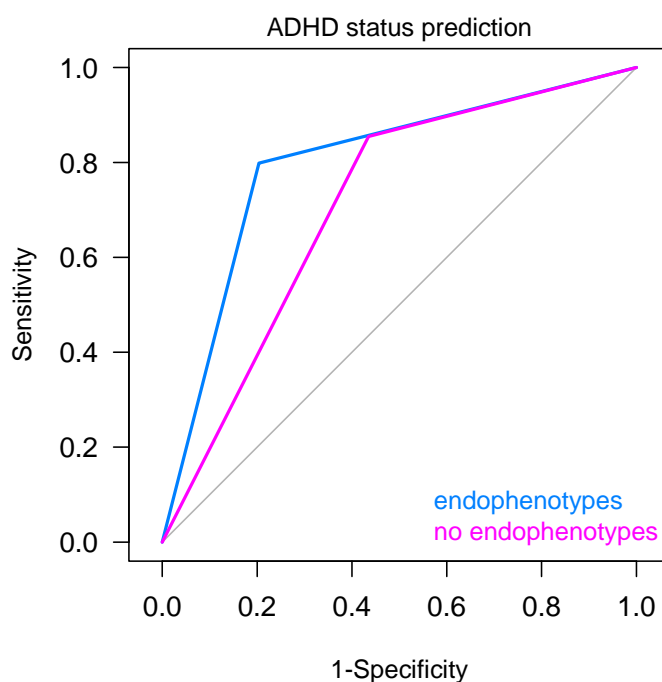

**Supplementary Figure 1.** ROC curves of predictive models for ADHD diagnosis including only demographic information (model 1, in pink) and endophenotypes (model 2, in blue). See Table 2 for more information on the neuropsychological tasks that met the endophenotypes criteria. Our results indicate that model 2 outperforms model 1 as measured by the specificity (0.796 vs. 0.565,  $P < 0.01$ ), classification rate (0.795 vs. 0.712,  $P < 0.05$ ), AUC (0.797 vs. 0.709,  $P < 0.05$ ) and lift (1.531 vs. 1.296,  $P < 0.05$ ) measures, and have a similar sensitivity (0.798 vs. 0.854,  $P > 0.05$ ). Overall, including the endophenotypes in the predictive model improves ADHD diagnosis classification compared to using demographic data alone.
